# Supplementary material for: Study supports for rural mature-aged university health students: a Stakian multicase study
Source: PubMed Central journal article supplement (PMC10880340; doi:10.1186/s12909-024-05128-4), 2024-02-20
Supplement: 12909_2024_5128_MOESM2_ESM.pdf [file 12909_2024_5128_MOESM2_ESM.pdf]

## **Additional file 2**

To be read alongside article “Study supports for rural mature-aged university health students: a Stakian multicase study” published in BMC Medical Education.

Authors: Quilliam, C., Crawford, N., McKinstry, C., Buccheri, A., & Brito, S.

Additional file 2 provides supplementary information regarding current supports identified by participants.

## Current supports identified by participants

Table 1. University-provided supports (informal)

| Categories                              | Case one                                                                                           | Case two                                                                                                                     | Case three                                                                                                                     |
|-----------------------------------------|----------------------------------------------------------------------------------------------------|------------------------------------------------------------------------------------------------------------------------------|--------------------------------------------------------------------------------------------------------------------------------|
| <b>Campus culture</b>                   |                                                                                                    |                                                                                                                              | The campus atmosphere/environment: being inclusive and supportive, friendly                                                    |
| <b>Interpersonal supports</b>           | Academic staff building rapport to enable timely supports                                          | “It’s that relationship that we build with them”: maintaining strong relationships with students                             | Academic staff knowing students, understanding their circumstances and noticing their challenges                               |
|                                         |                                                                                                    | Academic staff being family friendly (supporting students with young children/babies to attend class)                        |                                                                                                                                |
|                                         | Academic staff being approachable and responsive, having one on one chats: “make myself available” | “You don’t let someone you know struggle”: Academic staff reaching out to struggling students and being available for a chat | “They will often be the person that a student will talk to first”: Academics talking with students and providing pastoral care |
| <b>Course supports</b>                  | Academic staff providing assignment due date extensions and special consideration support          | Academic staff coordinating changes to study for students facing personal issues                                             | Academic staff using their discretion around rules—e.g., provide extensions because they know the students’ circumstances      |
|                                         | Academic staff supporting students to submit assignments                                           | Academic staff supporting students to catch up on content                                                                    | Academic staff providing useful feedback on assessments                                                                        |
| <b>Referring and providing services</b> | Academic staff being referral agents                                                               | Academic staff referring students to services                                                                                | Academic staff referring students to relevant services                                                                         |
|                                         | Academic staff providing mental health services                                                    | Professional staff referring students to services                                                                            |                                                                                                                                |
| <b>Placement adaption supports</b>      |                                                                                                    | Allowing students to have input into placement allocation                                                                    |                                                                                                                                |

Table 2. University-provided supports (formal)

| Categories                             | Case one                                     |                                  | Case two                                  | Case three                                                                                               |                                                                          |
|----------------------------------------|----------------------------------------------|----------------------------------|-------------------------------------------|----------------------------------------------------------------------------------------------------------|--------------------------------------------------------------------------|
| <b>Campus characteristics supports</b> | Campus location                              | Small class sizes in small rooms | Creating flexible and adaptive curriculum | Existence of the campus: provision of physical study place                                               | Relatively smaller class sizes—staff and students get to know each other |
|                                        | Delivery of coursework in regional hospitals | Blended learning                 | Blended delivery                          |                                                                                                          |                                                                          |
|                                        | Regional University Study Hub location       | Opportunity to study part-time   |                                           | Pathways to university: e.g., being able to articulate from a TAFE nursing course to a university course |                                                                          |
| <b>General administrative supports</b> | IT support                                   | Case management                  | IT support                                | Guides/FAQs provided online                                                                              |                                                                          |
|                                        | Peer administration support                  |                                  | Student advisors                          | Student advisors (including a Student experience advisor)                                                | Student administrative support                                           |
|                                        |                                              |                                  |                                           | On campus childcare                                                                                      | Careers event (prior to COVID-19): Careers                               |

|                                      |                                                      |                                                                        |                                                          |                                |                                                                         |                                                                             |
|--------------------------------------|------------------------------------------------------|------------------------------------------------------------------------|----------------------------------------------------------|--------------------------------|-------------------------------------------------------------------------|-----------------------------------------------------------------------------|
|                                      |                                                      |                                                                        |                                                          |                                |                                                                         | dinner including local industry stakeholders and students                   |
| <b>Academic supports</b>             | Library access                                       | Writing feedback program                                               | Library consult supports                                 | Studiosity                     | Librarian                                                               |                                                                             |
|                                      | Preparatory program (offered to commencing students) | Foundation studies program (taken 6 months before course commencement) | Transition course                                        |                                | Transition program for nursing TAFE students articulating to university | Extra-curricular events for students (e.g., mental health first aid course) |
|                                      | Peer-facilitated subject support groups              | Industry entry academic sessions                                       | Study sessions                                           | Assignment and exam extensions | Sessions for specific courses—e.g., librarian attending nursing classes |                                                                             |
|                                      | Learning skills advisors                             | Online academic information                                            | Academic supports (previously known as the learning hub) | Peer learning advisors         | Academic skills support                                                 | Peer learning advisors                                                      |
| <b>Wellbeing and social supports</b> | Counselling services                                 | Crisis telephone line                                                  | Wellbeing services (counselling)                         | Wellbeing events               | Counselling services                                                    | Social events (prior to COVID-19): e.g., a “Bring your child to uni” day    |

|                           |                                                     |                                                       |                                                |              |                                        |                                            |
|---------------------------|-----------------------------------------------------|-------------------------------------------------------|------------------------------------------------|--------------|----------------------------------------|--------------------------------------------|
|                           | Disability support officers (learning access plans) | Aboriginal and Torres Strait Islander support workers | Accessibility supports (learning access plans) |              | engagement program for online students | Industry connections for future employment |
|                           |                                                     |                                                       | Social events                                  |              | Peer leadership: Student association   |                                            |
| <b>Financial supports</b> | Financial services                                  | Scholarships                                          | Finance supports                               | Scholarships | Food programs                          | Grants/bursaries                           |
| <b>Placement supports</b> | Placement location special consideration            | Student grants                                        |                                                |              | Placement liaison person               |                                            |

Table 3. Community-provided supports

| Categories                                  | Case one                                                              | Case two                                                                          | Case three                                                                                                                         |
|---------------------------------------------|-----------------------------------------------------------------------|-----------------------------------------------------------------------------------|------------------------------------------------------------------------------------------------------------------------------------|
| <b>Placement preparation supports</b>       | Local hospital providing future workplace opportunities via placement | Using community connections to provide flexible placements                        | Support of local health providers (taking students on placement)                                                                   |
|                                             | Student placement accommodation                                       | Taking a “personal approach” to organising placements                             |                                                                                                                                    |
| <b>Broad host organisation supports</b>     | Host organisations working with universities to manage placements     | Fostering good communication with mature-aged students on placement               | Support from the health service while on placement                                                                                 |
|                                             | “Trying to get them through”: providing flexible placement days       | Student orientation video                                                         |                                                                                                                                    |
|                                             |                                                                       | Initial placement conversations about support                                     |                                                                                                                                    |
|                                             |                                                                       | Taking a personal support approach to supporting students <i>during</i> placement |                                                                                                                                    |
| <b>Placement supervisor supports</b>        | “Giving them opportunity”: supporting mature-aged students to learn   | Placement supervisors writing grants for mature-aged students                     | Supportive staff while on placement (e.g., supervisor)                                                                             |
|                                             |                                                                       | Placement supervisors providing emotional support on placement                    | Debrief sessions/check-ins (while on placement)                                                                                    |
|                                             |                                                                       | Making students feel like part of the team                                        |                                                                                                                                    |
| <b>Employer and work colleague supports</b> | Employer flexibility                                                  | Supportive employer                                                               | Students having a workplace supportive of them studying at university (e.g., can take study leave from job to undertake placement) |
|                                             | Healthcare colleagues offering feedback                               |                                                                                   |                                                                                                                                    |
|                                             | Healthcare services providing employee                                |                                                                                   |                                                                                                                                    |

|                                           |                                           |                                            |                                                 |
|-------------------------------------------|-------------------------------------------|--------------------------------------------|-------------------------------------------------|
|                                           | sponsorship                               |                                            |                                                 |
| <b>Financial and information supports</b> | Grants offered external to the university | Government funded scholarships             | Government funded placement website             |
|                                           |                                           | Facilitating internships around placements | Bursaries for placements (via external sources) |
| <b>Community services</b>                 | After school care                         |                                            |                                                 |

Table 4. Student-provided supports

| Categories                           | Case one                                                                                      |                                               | Case two                                                                  |                                                                                          | Case three                                                                                                                                             |                                                                                                                                                            |
|--------------------------------------|-----------------------------------------------------------------------------------------------|-----------------------------------------------|---------------------------------------------------------------------------|------------------------------------------------------------------------------------------|--------------------------------------------------------------------------------------------------------------------------------------------------------|------------------------------------------------------------------------------------------------------------------------------------------------------------|
| <b>Individual strategies</b>         | Using social media to plan study activities and manage non-university responsibilities        | Choosing work shifts to fit study commitments | Study space                                                               |                                                                                          | Maintaining physical activities                                                                                                                        | Time management                                                                                                                                            |
|                                      |                                                                                               |                                               |                                                                           |                                                                                          | Negotiation to manage placements                                                                                                                       | Maintaining home life                                                                                                                                      |
| <b>Peer supports</b>                 | Mature-aged students supporting other by communicating and sharing strategies (mostly online) |                                               | Mature-aged student connections                                           | Online social media student discussion                                                   | Mature-aged students supporting each other (e.g., understand each other; pick up each other's children from school; swap work shifts with each other). | Mature-aged students are a resource—e.g., provide information about their course to each other (especially for students who missed orientation or classes) |
|                                      | Mature-aged students supporting other via mature-aged students study group                    | Discipline-specific support communities       | Discipline-specific social groups (initiated and facilitated by students) |                                                                                          | Study groups                                                                                                                                           | Student association: Social work club (run by mature-aged students)                                                                                        |
|                                      | Mature-aged students supporting each other on placement                                       | Friends (outside of university) as support    |                                                                           | Connections between diverse students (school leavers and mature-aged) within disciplines | Peer support while on placements                                                                                                                       | Mature-aged students mentoring younger students                                                                                                            |
| <b>Partner supports</b>              | Partner support                                                                               |                                               | Supportive partner                                                        |                                                                                          |                                                                                                                                                        |                                                                                                                                                            |
| <b>Immediate and extended family</b> | Family support                                                                                |                                               | Supportive extended family                                                |                                                                                          | Family support                                                                                                                                         |                                                                                                                                                            |



---

|                 |                                                                                   |                                  |
|-----------------|-----------------------------------------------------------------------------------|----------------------------------|
| <b>supports</b> | “Showing them anything is possible”:<br>Illustrating academic success to children | Children providing encouragement |
|-----------------|-----------------------------------------------------------------------------------|----------------------------------|

---
